# Supplementary material
Source: PubMed Central journal article supplement (PMC7869661)
Supplement: original-submission.pdf [file original-submission.pdf]

1  
2  
3 **Missed Opportunities for the Prevention of Vertical HIV Transmission in Canada, 1997 –**  
4 **2016**

5  
6 Ari Bitnun, MD, MSc<sup>1</sup>, Terry Lee PhD<sup>2</sup>, Jason Brophy MD, MSc<sup>3</sup>, Lindy M. Samson MD,  
7 MSc<sup>3</sup>, Fatima Kakkar MD, MPH<sup>4</sup>, Wendy Vaudry MD<sup>5</sup>, Ben Tan MD<sup>6</sup>, Deborah M. Money  
8 MD<sup>7,9</sup>, Joel Singer PhD<sup>2,8</sup>, Laura Sauve MD,MPH<sup>9</sup>, Ariane Alimenti MD<sup>9</sup> for the Canadian  
9 Perinatal HIV Surveillance Program.  
10  
11  
12  
13  
14

15 **Affiliations:**

- 16  
17 1. Department of Pediatrics, the Hospital for Sick Children, University of Toronto, Toronto,  
18 Canada  
19  
20 2. CIHR Canadian HIV Trials Network, Vancouver, British Columbia, Canada  
21  
22 3. Department of Pediatrics, Children's Hospital of Eastern Ontario, University of Ottawa,  
23 Ottawa, Ontario, Canada  
24  
25 4. Department of Pediatrics, Centre Hospitalier Universitaire Sainte-Justine, University of  
26 Montreal, Montreal, Quebec, Canada  
27  
28 5. Department of Pediatrics, Stollery Children's Hospital, University of Alberta, Edmonton,  
29 Alberta, Canada  
30  
31 6. Department of Pediatrics, Royal University Hospital, University of Saskatchewan,  
32 Saskatoon, Saskatchewan, Canada  
33  
34 7. BC Women's Hospital, Department of Obstetrics & Gynecology, University of British  
35 Columbia, Vancouver, British Columbia, Canada  
36  
37 8. School of Population and Public Health, University of British Columbia, Vancouver,  
38 British Columbia, Canada  
39  
40 9. Oak Tree Clinic, Women's Hospital and Health Centre of British Columbia, Department  
41 of Pediatrics, University of British Columbia, Vancouver, Canada  
42  
43  
44  
45  
46  
47  
48  
49  
50  
51  
52  
53  
54  
55  
56  
57  
58  
59  
60

1  
2  
3 **Corresponding author:**

4 Ari Bitnun, MD, MSc, FRCPC

5 Division of Infectious Diseases, Hospital for Sick Children

6 Toronto, Ontario, Canada, M5G 1X8

7 Telephone: 416 813 7654 ext. 2026268

8 Fax: 416 813 8404

9 Email: [ari.bitnun@sickkids.ca](mailto:ari.bitnun@sickkids.ca)

10  
11  
12  
13  
14  
15  
16  
17 **Meetings at which parts of the data were presented:**

18 Data from the Canadian Perinatal HIV Surveillance Program (CPHSP) are presented annually at  
19 the Canadian Conference on HIV/AIDS Research (CAHR). Presentations with a specific focus  
20 on missed opportunities for vertical HIV transmission prevention were given at the 24<sup>th</sup> Annual  
21 Canadian Conference on HIV/AIDS Research (CAHR), Toronto, Ontario, April 30 – May 3,  
22 2015 (Oral presentation O090) and the International AIDS Society (IAS) meeting, July 19 to  
23 July 22, 2015, Vancouver, British Columbia, Canada (poster MOPEC445).  
24  
25  
26  
27  
28  
29

30  
31 **Funding Source:**

32 The Canadian Perinatal HIV Surveillance Program is supported by the Public Health Agency of  
33 Canada. No specific funding was secured for this study.  
34  
35  
36

37  
38 **Competing interests:** None of the author have a conflict of interest in relation to this work  
39  
40

41 **Running head:** Vertical HIV transmission prevention, Canada  
42  
43  
44

45 **Word count:** 2548  
46  
47  
48  
49  
50  
51  
52  
53  
54  
55  
56  
57  
58  
59  
60

## ABSTRACT

**Background:** Vertical HIV transmission (VT) has declined significantly in Canada, but missed opportunities for prevention continue to occur.

**Methods:** The Canadian Perinatal HIV Surveillance Program collects data on mothers living with HIV and their infants. Receipt of adequate antiretroviral treatment (ART) (antenatal combination ART [cART]  $\geq 4$  weeks, intrapartum zidovudine receipt, 4-6 weeks infant zidovudine receipt) and predictors of inadequate antenatal cART (none/ $< 4$  weeks) were determined.

**Results:** 3785 mother-infant pairs were identified (1997-2016). Uptake of  $\geq 4$  weeks of antenatal cART improved over time across all provinces/territories and regardless of maternal risk category or race/ethnicity ( $p < 0.001$ ). During the 2011–2016 period, 6.5% of women received no/ $< 4$  weeks of antenatal cART, 10.7% of women received no intrapartum intravenous ZDV and 3.1% of infants received  $< 4$  weeks of oral zidovudine. In multivariate analysis restricted to the 2011–2016 period, better uptake of  $\geq 4$  weeks of antenatal cART was seen in black women (versus indigenous [ $p = 0.02$ ], versus white [ $p = 0.06$ ]) and in British Columbia/Yukon compared to Alberta, Ontario and Quebec ( $p = 0.04$  for all). Of 14 VT events during the 2011-2016 period (VT rate 1.0%), maternal diagnosis was established prior to onset of labour in only 5 cases and only 2 received  $\geq 4$  weeks of antenatal cART.

**Conclusions:** Efforts to improve timely access to care, HIV screening and treatment for all women, combined with enhanced resources targeting populations at increased HIV risk, will be needed if VT is to be eliminated in Canada.

1  
2  
3  
4  
5  
6  
7  
8  
9  
10  
11  
12  
13  
14  
15  
16  
17  
18  
19  
20  
21  
22  
23  
24  
25  
26  
27  
28  
29  
30  
31  
32  
33  
34  
35  
36  
37  
38  
39  
40  
41  
42  
43  
44  
45  
46  
47  
48  
49  
50  
51  
52  
53  
54  
55  
56  
57  
58  
59  
60

**KEY WORDS:** Human immunodeficiency virus, vertical transmission, child, missed opportunities, combination antiretroviral therapy

Confidential

## INTRODUCTION

With provision of combination antiretroviral therapy (cART) to women during pregnancy, intravenous zidovudine (ZDV) during labor, 4-6 weeks of oral ZDV to the newborn and exclusive formula feeding, the risk of vertical HIV transmission (VT) has declined to between 0.27% and 2.9% in developed countries.<sup>1-6</sup> Canadian data for the period between 1990 and 2010 demonstrated a VT rate of 16.4% when mothers received no antenatal cART, 1.6% when mothers were prescribed antenatal mono or dual nucleoside analogue therapy, and 1.0% when mothers were prescribed antenatal cART.<sup>4</sup>

Unfortunately, missed opportunities for the prevention of VT continue to occur in developed countries.<sup>7,8</sup> For example, among women enrolled in the European Collaborative Study, 9% of pregnant women between the years 2000 and 2009 (n=2148) received less than two weeks of antenatal cART or no antenatal cART, despite 50% of these women having been diagnosed with HIV infection before conception.<sup>7</sup> Risk factors that have been associated with ongoing VT include absent or inadequate antenatal care, late maternal diagnosis, maternal injection drug use (IDU), lack of antiretroviral treatment (ART) during pregnancy, labor and delivery, preterm delivery, and incomplete avoidance of breastfeeding.<sup>7-11</sup>

The objectives of the present study were to determine the adequacy, and changes over time in adequacy, of antenatal and intrapartum maternal and postpartum neonatal ART uptake for the prevention of VT, and determine the VT rate over time, and according to adequacy of antenatal ART, during the cART era (1997-2016) in Canada. We further sought to evaluate recent trends by investigating predictors of inadequate antenatal ART uptake for the 2011-2016 period.

## METHODS

The Canadian Perinatal HIV Surveillance Program (CPHSP) collects data from 23 HIV referral health centers and health departments from across Canada that includes representation from all provinces and territories. Twenty of the 23 centers are obstetric and/or pediatric care centers located in the 10 provinces; the remaining three are public health units of each of the three northern territories. The program was initiated in 1990 under the auspices of the Canadian Pediatric & Perinatal HIV/AIDS Research Group (CPARG) and is supported by the Public Health Agency of Canada (PHAC). Data management and analysis is conducted at the CIHR Canadian HIV Trials Network (CTN) data center in Vancouver, British Columbia. Ethical approval for the surveillance was obtained from the Research Ethics Boards of all participating centers.

The CPHSP methodology has been previously described.<sup>4</sup> Data is collected by retrospective chart review on an annual basis, and since 2008, submitted electronically via a secure web-based Oracle™ database. Maternal data includes country of birth, risk category for HIV acquisition, date of HIV diagnosis, self-reported race/ethnicity (according to national surveillance definitions), viral load, antenatal ARV regimen(s) and receipt of intrapartum ZDV. Infant data includes place of birth, mode of delivery, gestational age at birth, birth weight, sex, ART prophylaxis and HIV status. Of the variables listed above, two (maternal VL, infant birth weight) began being collected systematically in 2008. Infant HIV status was reported as confirmed if HIV was detected in two separately timed virologic assays prior to 18–24 months of age or by HIV serology after that age. HIV negative status was defined by having  $\geq 2$  separately timed negative virologic assay results taken at one month of age or later during the first 18 months of

1  
2  
3 life or by negative HIV serology after that age. Indeterminate status was reserved for cases not  
4  
5 finalized by these criteria.  
6  
7

8  
9 To be eligible for inclusion in this study, children had to be born in Canada between January 1,  
10  
11 1997 and December 31, 2016 to a mother with confirmed HIV infection. Inadequate ART was  
12  
13 defined by receipt of <4 weeks of antenatal cART, failure to receive intrapartum intravenous  
14  
15 ZDV or receipt of <4 weeks of oral ZDV by the infant, the latter two in accordance with current  
16  
17 Canadian guidelines.<sup>12,13</sup> The specific study objectives were to describe: (a) the proportion of  
18  
19 mothers and infants who received inadequate ART interventions; (b) changes over time in the  
20  
21 proportion of mothers and infants who received inadequate ART interventions; (c) VT rates over  
22  
23 time and according to adequacy of antenatal ART; (d) predictors of inadequate antenatal ART.  
24  
25 The analysis of predictors of inadequate antenatal cART uptake was restricted to the 2011–2016  
26  
27 period as this was deemed most relevant to the current situation.  
28  
29  
30

31  
32 Demographic characteristics were summarized using percentages, means with standard  
33  
34 deviations or medians with ranges as appropriate. Chi square or Fisher's exact test was used to  
35  
36 compare the maternal risk category, maternal race/ethnicity, geographic region of birth, timing of  
37  
38 maternal diagnosis, and ART rates across time periods as appropriate. Time trend of rates were  
39  
40 assessed using logistic regression with child birth year being modelled as a continuous variable.  
41  
42 Logistic regression modelling was used to examine the relationship between antenatal cART  
43  
44 uptake and potential explanatory variables including demographic and clinical characteristics and  
45  
46 year of birth (mother-infant pairs [MIPs] with missing documentation of antenatal cART receipt  
47  
48 were excluded). For detailed review of VT events, all cases were included regardless of data  
49  
50 completeness. Analyses were conducted using SAS 9.4 (SAS Institute, Cary, NC).  
51  
52  
53  
54  
55  
56  
57  
58  
59  
60

## RESULTS

3785 infants were born in Canada to mothers with documented HIV infection during the study period. Their baseline maternal characteristics and delivery related factors are shown in Table 1. In 60 MIPs (1.6%) infant HIV status was indeterminate, with explanation documented in 19 (death [n=10]; moved out of Canada [n=8]); the remaining 42 were lost to follow-up. All deaths occurred within five months of birth and none were attributed to HIV. The VT rate for the 3725 (98.4%) MIPs for whom final infant HIV status was available for the full study period was 3.4% (125/3725). During the 2011–2016 period the VT rate was 1.0% (14/1385). The VT rate for the full study period was 28.9% in the absence of antenatal cART, 4.3% with <4 weeks of antenatal cART and 0.2% with  $\geq 4$  weeks of antenatal cART.

ART uptake information was complete in 3724 of 3785 MIPs (98.4%); information was missing on antenatal cART for 21 cases, intrapartum intravenous ZDV for 50 cases and infant ZDV for 12 cases. Inadequate ART was noted in 29.9% (n=1112) of MIP including: 21.4% (n=804) of mothers who received either no antenatal cART (9.5%; n=359) or <4 weeks of antenatal cART (11.8%; n=445); 14.0% (n=523) of mothers who received no intrapartum intravenous ZDV; 6.3% (n=237) of infants who received <4 weeks of oral ZDV. The proportion of mothers receiving  $\geq 4$  weeks of antenatal cART improved significantly over time, in all regions regardless of maternal risk category or race/ethnicity (Figure 1). Receipt of intrapartum intravenous ZDV and  $\geq 4$  weeks of neonatal ZDV also improved significantly over time (OR per calendar year 1.05 [95% CI 1.03, 1.07],  $p < 0.001$  and OR per calendar year 1.13 [95% CI 1.10, 1.16],  $p < 0.001$ , respectively). Nevertheless, during the 2011–2016 period, 6.5% (n=92) of women received inadequate antenatal cART (none 3.6% [n=51], <4 weeks 2.9% [n=41]; Table 2), 10.7% (n=146) of women received no intrapartum intravenous ZDV and 3.1% (n=43) of infants received <4



1  
2  
3 weeks of oral ZDV. Among women diagnosed prior to the third trimester during this period  
4  
5 (n=1302), 2.5% received <4 weeks of antenatal cART and 1.8% received no antenatal cART.  
6  
7

8  
9 Timing of maternal diagnosis, available for 3317 (87.6%) MIPs, was established prior to the  
10  
11 third trimester in 92.5%, increasing from 67.4% in 1997 to 94.4% in 2016 (OR per calendar year  
12  
13 1.16 [95% CI 1.13, 1.19]; p<0.001). For the 2011–2016 period (n=1355), maternal diagnosis  
14  
15 prior to the third trimester was lower for indigenous women (92.9%) compared to white women  
16  
17 (97.2%; p=0.025) and black women (97.8%; p<0.001) and for women with IDU as their risk  
18  
19 category compared to women with heterosexual as their risk category (92.7% vs. 97.8%;  
20  
21 p<0.001). For both indigenous and white women, diagnosis prior to the third trimester was lower  
22  
23 in those with IDU as risk category compared to those with heterosexual as risk category (91.3%  
24  
25 vs. 96.7% for indigenous women, p=0.10; 95.1% vs. 98.1% for white women, p=0.21). There  
26  
27 were no black women with IDU noted as risk category.  
28  
29  
30  
31

32  
33 During the 2011–2016 period, maternal risk category and maternal race, but not province of  
34  
35 delivery, were significantly associated with adequacy of antenatal cART (Table 2). Among  
36  
37 women with heterosexual as risk category, adequate antenatal cART was received by 90.5% of  
38  
39 indigenous women compared to 95.5% of black women (p=0.047) and 94.4% of white women  
40  
41 (p=0.31). Among white women whose risk category was IDU, 85.0% received  $\geq$ 4 weeks of  
42  
43 antenatal cART, 1.7% received <4 weeks of antenatal cART and 13.3% received no antenatal  
44  
45 cART. The corresponding proportions for indigenous women whose risk category was IDU were  
46  
47 91.1%, 2.6% and 6.3%, respectively. In Ontario and Quebec, where IDU accounted for <10.0%  
48  
49 of cases, receipt of  $\geq$ 4 weeks of antenatal cART among women who inject drugs was 72.7% and  
50  
51 75.0%, respectively. By contrast, in Saskatchewan, British Columbia, Manitoba and Alberta,  
52  
53  
54  
55  
56  
57  
58  
59  
60

1  
2  
3 where IDU accounted for a higher proportion of cases, 90.9–95.2% of such women received  $\geq 4$   
4 weeks of antenatal cART ( $p=0.006$ ).  
5  
6

7  
8 Univariate and multivariate analysis of potential predictors of adequate antenatal cART uptake  
9 for the 2011–2016 period are depicted in Table 3. In univariate analysis, better uptake of  
10 antenatal cART was observed among black women compared to both indigenous women and  
11 white women and among women whose risk category was heterosexual compared to IDU. In the  
12 multivariate analysis, better uptake of cART among black women compared to indigenous  
13 women remained significant, while that for black women compared to white women showed  
14 borderline significance. Having delivered in British Columbia/Yukon was associated with better  
15 antenatal cART uptake compared to Alberta, Ontario and Quebec. The impact of risk category  
16 was no longer significant in the multivariate model. Gestational age at birth and birth year were  
17 not significantly associated with antenatal cART uptake in either the univariate or multivariate  
18 analysis. In a separate multivariate analysis, that included a race-risk category interaction term,  
19 adequate antenatal cART among women with heterosexual as risk category was significantly  
20 better for black women compared to indigenous women (OR 3.94 [1.53, 10.14],  $p=0.004$ ) and  
21 borderline-significant for white women compared to indigenous women (OR 2.93 [1.00, 8.65],  
22  $p=0.051$ ).  
23  
24  
25  
26  
27  
28  
29  
30  
31  
32  
33  
34  
35  
36  
37  
38  
39  
40  
41  
42  
43

44 Of 125 documented VT events, 111 occurred during the 1997–2010 period and 14 occurred  
45 during the 2011–2016 period (Figure 2). Eighty-six (68.8%) VT events involved mothers who  
46 were diagnosed intrapartum ( $n=18$ ) or post-partum ( $n=68$ ). Of the 36 VT events involving  
47 mothers diagnosed antenatally, maternal cART was not taken during pregnancy in 12 cases,  
48 taken for  $<4$  weeks before delivery in 18 cases and taken for  $\geq 4$  weeks before delivery in 5 cases  
49 (maternal treatment status unknown in one case). Poor maternal adherence was documented in  
50  
51  
52  
53  
54  
55  
56  
57  
58  
59  
60

1  
2  
3 three of the latter five infants. Salient MIP characteristics for the 14 VT cases that occurred in the  
4  
5 2011–2016 period are shown in Table 4. Maternal diagnosis was established prior to the third  
6  
7 trimester in only 5 of these 14 cases, and only 2 received  $\geq 4$  weeks of antenatal cART.  
8  
9

## 10 11 12 13 **DISCUSSION**

14  
15 A major finding of this study was the significant reduction in VT over time, corresponding with  
16  
17 a steady improvement in early diagnosis and ART uptake antenatally and intrapartum among  
18  
19 pregnant women living with HIV and in their children during the neonatal period. Nevertheless,  
20  
21 as demonstrated by the 14 children who acquired HIV vertically between 2011 and 2016 and by  
22  
23 the observation that 6.5% of women (n=92) received <4 weeks or no antenatal cART during the  
24  
25 same period, there remains room for improvement in prevention efforts in Canada.  
26  
27

28  
29 Although improvement in ART uptake was observed across all regions and irrespective of  
30  
31 maternal risk category or race, our findings suggest that certain populations in Canada continue  
32  
33 to have lower rates of timely diagnosis and antenatal cART uptake. IDU was associated with late  
34  
35 maternal diagnosis and, in Ontario and Quebec (where IDU was relatively uncommon as  
36  
37 maternal risk category), with a lower rate of adequate antenatal cART uptake. The importance of  
38  
39 substance abuse as a predictor of late diagnosis, suboptimal ART, and VT is corroborated by  
40  
41 multiple studies from the U.S. and Europe.<sup>3,7,9,14-16</sup> The lower uptake of antenatal cART in the  
42  
43 adjusted analysis for Ontario and Quebec compared to British Columbia/Yukon may reflect, in  
44  
45 part, the low uptake of antenatal cART among women who inject drugs in the former two  
46  
47 provinces. In this regard, it is noteworthy that the uptake of antenatal cART was relatively  
48  
49 uniform across maternal risk categories for all provinces except Ontario and Quebec. Potential  
50  
51 explanations for the lower uptake of antenatal cART among indigenous women compared to  
52  
53  
54  
55  
56  
57  
58  
59  
60

1  
2  
3 black and white women cannot be determined from our data, but likely reflects differences in  
4 access to care.<sup>17</sup>  
5  
6

7  
8 Experience from the French Perinatal Cohort whereby no VT events were observed from the  
9 2651 women initiated on cART prior to conception and had an undetectable VL at delivery  
10 supports the possibility that with effective interventions, VT can be eliminated.<sup>5</sup> Our results  
11 suggest that this is an achievable goal in Canada, although this would require concerted  
12 commitment and effort given that over two-thirds of VT events in our cohort occurred in MIPs  
13 where the woman was diagnosed after delivery, and of those involving mothers diagnosed  
14 antenatally, only 14% (5/36) had received  $\geq 4$  weeks of cART before delivery. Enhanced efforts  
15 aimed at engaging all women in care and screening them for HIV infection preferably prior to  
16 conception or as early in pregnancy as possible followed by prompt initiation of cART will be  
17 required.<sup>5,14</sup> Treating each VT event as a sentinel health event, whereby system failures are  
18 identified and corrected was associated with a reduction in VT rate from 4.3% to 0% in  
19 Philadelphia, and could potentially be helpful in Canada.<sup>18</sup> Applying such a strategy will require  
20 adequate resources for Public Health, close collaboration between public health and frontline  
21 healthcare providers, and perhaps most importantly, strong community engagement.  
22  
23  
24  
25  
26  
27  
28  
29  
30  
31  
32  
33  
34  
35  
36  
37  
38  
39  
40

41 A limitation of the CPHSP database is that it does not capture pregnant women living with HIV  
42 whose status is unknown either because they did not access antenatal care, declined HIV testing  
43 or had a post-testing seroconversion in pregnancy. In addition, there may be children living with  
44 HIV who are not yet identified because they and their mothers remain undiagnosed. It is also  
45 possible that a small proportion of MIPs were missed because they received their care at non-  
46 CPHSP sites. However, due to the provincial referral systems in place, we believe there to be  
47 very few MIPs who are not captured in this national surveillance system. The usual limitations of  
48  
49  
50  
51  
52  
53  
54  
55  
56  
57  
58  
59  
60

1  
2  
3 retrospective data collection apply, although the impact of this was tempered by our ability to  
4 obtain missing data in the process of routine infant follow-up. Incomplete data on maternal ART  
5 (1.6%) or final infant HIV status (1.6%) was uncommon and therefore unlikely to have impacted  
6 key study findings.  
7  
8  
9  
10  
11

12  
13 In conclusion, while there has been a steady decline in the rate of VT of HIV in Canada, infant  
14 infections continue to occur primarily as a result of incomplete implementation of known,  
15 evidence based interventions. A major gap is the significant number of women who either do not  
16 receive antenatal cART or are not initiated on cART until late in gestation. Efforts to improve  
17 women-centered timely access to care, HIV screening and treatment for all women, combined  
18 with enhanced resources targeting populations at increased HIV risk, will be needed if VT is to  
19 be eliminated in Canada.  
20  
21  
22  
23  
24  
25  
26  
27  
28  
29  
30  
31  
32  
33  
34  
35  
36  
37  
38  
39  
40  
41  
42  
43  
44  
45  
46  
47  
48  
49  
50  
51  
52  
53  
54  
55  
56  
57  
58  
59  
60

## ACKNOWLEDGEMENTS

We wish to acknowledge Dr.'s Susan King (deceased), Stanley E. Read, Dorothy Moore, Normand Lapointe and John Forbes for their foresight in establishing the Canadian Pediatric & Perinatal Research Group (CPARG) as well as the Canadian Perinatal HIV Surveillance Program (CPHSP) in the early 1990's without which this research would not be possible.

The authors thank all the site investigators at the participating centres for contributing data annually: Francois Boucher, Natalie Bridger, Jared Bullard, Jeff Cohen, Rick Cooper, Michele Ellis, Scott Halperin, Brendan Hanley, Taj Jadavji, Chris Karatzios, Kirk Liefso, Athena McConnell, Heather Onyett, Joan Robinson, Roger Sandre, Sandi Seigel, Michael Young.

The CPHSP is funded by the HIV/AIDS Surveillance Section, Surveillance and Risk Assessment Division, Public Health Agency of Canada, Ottawa, Canada. The Canadian Institutes of Health Research – Canadian HIV Trials Network, Vancouver, British Columbia, Canada provided support for the programme.

**REFERENCES**

1. Warszawski J, Tubiana R, Le Chenadec J, et al. Mother-to-child HIV transmission despite antiretroviral therapy in the ANRS French Perinatal Cohort. *AIDS*. 2008;22(2):289-299.
2. Townsend CL, Byrne L, Cortina-Borja M, et al. Earlier initiation of ART and further decline in mother-to-child HIV transmission rates, 2000-2011. *AIDS*. 2014;28(7):1049-1057.
3. Whitmore SK, Taylor AW, Espinoza L, Shouse RL, Lampe MA, Nesheim S. Correlates of mother-to-child transmission of HIV in the United States and Puerto Rico. *Pediatrics*. 2012;129(1):e74-81.
4. Forbes JC, Alimenti AM, Singer J, et al. A national review of vertical HIV transmission. *AIDS*. 2012;26(6):757-763.
5. Mandelbrot L, Tubiana R, Le Chenadec J, et al. No perinatal HIV-1 transmission from women with effective antiretroviral therapy starting before conception. *Clin Infect Dis*. 2015;61(11):1715-1725.
6. Scott GB, Brogly SB, Muenz D, Stek AM, Read JS, International Maternal Pediatric Adolescent ACTG P1107. Missed Opportunities for Prevention of Mother-to-Child Transmission of Human Immunodeficiency Virus. *Obstetrics and gynecology*. 2017;129(4):621-628.
7. European Collaborative Study in E, Bailey H, Townsend C, Cortina-Borja M, Thorne C. Insufficient antiretroviral therapy in pregnancy: missed opportunities for prevention of mother-to-child transmission of HIV in Europe. *Antivir Ther*. 2011;16(6):895-903.

- 1  
2  
3 8. Taylor AW, Nesheim SR, Zhang X, et al. Estimated Perinatal HIV Infection Among  
4  
5 Infants Born in the United States, 2002-2013. *JAMA pediatrics*. 2017;171(5):435-442.  
6
- 7  
8 9. Trepka MJ, Mukherjee S, Beck-Sague C, et al. Missed Opportunities for Preventing  
9  
10 Perinatal Transmission of Human Immunodeficiency Virus, Florida, 2007-2014. *South*  
11  
12 *Med J*. 2017;110(2):116-128.  
13
- 14  
15 10. Read JS, Cohen RA, Hance LF, et al. Missed opportunities for prevention of mother-to-  
16  
17 child transmission of HIV-1 in the NISDI Perinatal and LILAC cohorts. *Int J Gynaecol*  
18  
19 *Obstet*. 2012;119(1):70-75.  
20
- 21  
22 11. Prieto LM, Gonzalez-Tome MI, Munoz E, et al. Low rates of mother-to-child  
23  
24 transmission of HIV-1 and risk factors for infection in Spain: 2000-2007. *Pediatr Infect*  
25  
26 *Dis J*. 2012;31(10):1053-1058.  
27
- 28  
29 12. Money D, Tulloch K, Boucoiran I, et al. Guidelines for the care of pregnant women  
30  
31 living with HIV and interventions to reduce perinatal transmission: executive summary. *J*  
32  
33 *Obstet Gynaecol Can*. 2014;36(8):721-751.  
34
- 35  
36 13. Bitnun A, Brophy J, Samson L, et al. Prevention of vertical HIV transmission and  
37  
38 management of the HIV-exposed infant in Canada in 2014. *Can J Infect Dis Med*  
39  
40 *Microbiol*. 2014;25(2):75-77.  
41
- 42  
43 14. Camacho-Gonzalez AF, Kingbo MH, Boylan A, Eckard AR, Chahrودي A, Chakraborty  
44  
45 R. Missed opportunities for prevention of mother-to-child transmission in the United  
46  
47 States. *AIDS*. 2015;29(12):1511-1515.  
48
- 49  
50 15. Peters V, Liu KL, Dominguez K, et al. Missed opportunities for perinatal HIV prevention  
51  
52 among HIV-exposed infants born 1996-2000, pediatric spectrum of HIV disease cohort.  
53  
54 *Pediatrics*. 2003;111(5 Pt 2):1186-1191.  
55  
56  
57  
58  
59  
60



- 1  
2  
3  
4  
5  
6  
7  
8  
9  
10  
11  
12  
13  
14  
15  
16  
17  
18  
19  
20  
21  
22  
23  
24  
25  
26  
27  
28  
29  
30  
31  
32  
33  
34  
35  
36  
37  
38  
39  
40  
41  
42  
43  
44  
45  
46  
47  
48  
49  
50  
51  
52  
53  
54  
55  
56  
57  
58  
59  
60
16. Whitmore SK, Patel-Larson A, Espinoza L, Ruffo NM, Rao S. Missed opportunities to prevent perinatal human immunodeficiency virus transmission in 15 jurisdictions in the United States during 2005-2008. *Women Health*. 2010;50(5):414-425.
  17. Riddell CA, Hutcheon JA, Dahlgren LS. Differences in obstetric care among nulliparous First Nations and non-First Nations women in British Columbia, Canada. *CMAJ : Canadian Medical Association journal = journal de l'Association medicale canadienne*. 2016;188(2):E36-43.
  18. Esber A, Cohen S, Dempsey A, Cheever LW. Using Systems of Care and a Public Health Approach to Achieve Zero Perinatal HIV Transmissions. *JAMA pediatrics*. 2017;171(5):421-422.

1  
2  
3  
4  
5 **Figure 1:**

6 Title: Uptake of antenatal cART  $\geq$  4 weeks prior to delivery by year.  
7  
8  
9

10 Legend: Percentage receiving antenatal maternal cART  $\geq$  4 weeks according to risk category (a),  
11 race/ethnicity (b) and geographic region (c). By logistic regression, with year as a continuous  
12 variable, there was statistically significant time-trend improvement in antenatal cART uptake  
13 (p<0.001 for all categories in the three plots). For Saskatchewan and Manitoba, data from  
14 earlier years were not shown due to small numbers.  
15  
16  
17  
18  
19  
20  
21  
22  
23

24 **Figure 2:**

25 Title: Perinatal infections by birth year and antenatal maternal cART.  
26  
27  
28  
29  
30  
31  
32  
33  
34  
35  
36  
37  
38  
39  
40  
41  
42  
43  
44  
45  
46  
47  
48  
49  
50  
51  
52  
53  
54  
55  
56  
57  
58  
59  
60

**Table 1: Maternal and delivery related characteristics, 1997–2016 (n=3785) ▪ §**

|                                                |              |
|------------------------------------------------|--------------|
| <b>Maternal risk category (n=3459) †</b>       |              |
| Heterosexual                                   | 2555 (73.9%) |
| Intravenous drug use                           | 788 (22.8%)  |
| Perinatal                                      | 44 (1.3%)    |
| Other                                          | 72 (2.1%)    |
| <b>Maternal race/ethnicity (n=3723) ‡</b>      |              |
| Black                                          | 1868 (50.2%) |
| White                                          | 843 (22.6%)  |
| Indigenous                                     | 778 (20.9%)  |
| Other                                          | 234 (6.3%)   |
| <b>Timing of maternal diagnosis (n=3317) €</b> |              |
| Before conception                              | 2593 (78.2%) |
| First trimester                                | 197 (5.9%)   |
| Second trimester                               | 278 (8.4%)   |
| Third trimester                                | 103 (3.1%)   |
| At delivery                                    | 53 (1.6%)    |
| After delivery                                 | 93 (2.8%)    |
| <b>Antenatal cART (n=3764)</b>                 |              |
| ≥ 4 weeks                                      | 2960 (78.6%) |
| < 4 weeks                                      | 445 (11.8%)  |
| None                                           | 359 (9.5%)   |
| <b>Maternal VL nearest delivery (n=2467) •</b> |              |
| < 50 copies/mL                                 | 2031 (82.3%) |
| 50–999 copies/mL                               | 270 (10.9%)  |
| ≥ 1000 copies/mL                               | 166 (6.7%)   |
| <b>Mode of delivery (n=3680)</b>               |              |
| Vaginal                                        | 2235 (60.7%) |
| Elective Caesarean section                     | 961 (26.1%)  |
| Emergency Caesarean section                    | 484 (13.2%)  |
| <b>Gestational age at birth (n=3394)</b>       |              |
| ≥ 37 weeks                                     | 2825 (83.2%) |
| 34–36 weeks                                    | 396 (11.7%)  |
| < 34 weeks                                     | 173 (5.1%)   |
| <b>Province/territory of Birth (n=3785) ¶</b>  |              |
| Ontario                                        | 1294 (34.2%) |
| Quebec                                         | 859 (22.7%)  |
| Alberta                                        | 575 (15.2%)  |
| British Columbia/Yukon *                       | 493 (13.0%)  |
| Saskatchewan                                   | 288 (7.6%)   |
| Manitoba                                       | 247 (6.5%)   |
| Atlantic Provinces                             | 29 (0.8%)    |

Abbreviations: VL = viral load

- Total available data points (n) indicated for each variable

- 1  
2  
3 § Mean gestational age and birth weight was 38.2 weeks (SD=2.41; n=3394) and  
4 3.04 kg (SD=0.65, n=3072), respectively; 51.4% were male  
5  
6 † Intravenous drug use was most prevalent as maternal risk category in  
7 Saskatchewan (76.2%), British Columbia (41.1%) and Manitoba (34.1%)  
8  
9 ‡ Black ethnicity/race predominated in Quebec (68.9%), Ontario (65.4%) and  
10 Alberta (45.0%); Indigenous ethnicity/race predominated in Saskatchewan  
11 (87.5%) and Manitoba (59.9%)  
12  
13 € For 416 cases diagnosis was prior to onset of labor, but the precise timing  
14 was unknown  
15  
16 ● Maternal viral load consistently collected since 2008  
17  
18 ¶ No cases from the North West Territories or Nunavut  
19  
20 \* < 5 cases from Yukon  
21  
22  
23  
24  
25  
26  
27  
28  
29  
30  
31  
32  
33  
34  
35  
36  
37  
38  
39  
40  
41  
42  
43  
44  
45  
46  
47  
48  
49  
50  
51  
52  
53  
54  
55  
56  
57  
58  
59  
60

Confidential

**Table 2: Antenatal cART uptake and duration prior to delivery, 2011–2016**

| Variable                         | Maternal cART and its duration ‡ |           |           | p value |
|----------------------------------|----------------------------------|-----------|-----------|---------|
|                                  | ≥ 4 weeks                        | < 4 weeks | None      |         |
| <b>Maternal risk category §</b>  |                                  |           |           | 0.015   |
| Heterosexual                     | 899 (94.8%)                      | 23 (2.4%) | 26 (2.7%) |         |
| Injection drug use               | 237 (89.8%)                      | 7 (2.7%)  | 20 (7.6%) |         |
| Perinatal                        | 29 (90.6%)                       | 2 (6.3%)  | 1 (3.1%)  |         |
| Other                            | 37 (97.4%)                       | 0 (0.0%)  | 1 (2.6%)  |         |
| <b>Maternal ethnicity/race ¶</b> |                                  |           |           | 0.003   |
| Black                            | 698 (95.2%)                      | 21 (2.9%) | 14 (1.9%) |         |
| Indigenous                       | 277 (90.2%)                      | 10 (3.3%) | 20 (6.5%) |         |
| White                            | 230 (91.6%)                      | 6 (2.4%)  | 15 (6.0%) |         |
| Other                            | 91 (95.8%)                       | 3 (3.2%)  | 1 (1.1%)  |         |
| <b>Province/territory *</b>      |                                  |           |           | 0.43    |
| Ontario                          | 474 (93.5%)                      | 13 (2.6%) | 20 (3.9%) |         |
| Quebec                           | 226 (93.8%)                      | 6 (2.5%)  | 9 (3.7%)  |         |
| Alberta                          | 209 (92.1%)                      | 10 (4.4%) | 8 (3.5%)  |         |
| Saskatchewan                     | 159 (92.4%)                      | 5 (2.9%)  | 8 (4.7%)  |         |
| British Columbia/Yukon           | 142 (96.6%)                      | 5 (3.4%)  | 0 (0.0%)  |         |
| Manitoba                         | 100 (93.5%)                      | 2 (1.9%)  | 5 (4.7%)  |         |
| Atlantic                         | 5 (83.3%)                        | 0 (0.0%)  | 1 (16.7%) |         |

‡ Premature delivery occurred in 17.9%; the rate was 17.5% for mothers who received ≥4 weeks of antenatal cART, 22.0% for mothers who received <4 weeks of antenatal cART and 26.7% for mothers who received no antenatal cART (p=0.23)

¶ Black ethnicity predominated in Quebec (73.9%), Ontario (67.1%) and Alberta (65.1%), whereas Indigenous ethnicity predominated in Saskatchewan (86.7%) and Manitoba (57.4%)

§ Injection drug use was the predominant risk category in Saskatchewan (74.0%); it was also listed a risk category for more than 10% of cases in British Columbia (39.0%), Manitoba (19.6%) and Alberta (16.7%); In Ontario and Quebec it accounted for 6.7% and 5.0% of listed risk category, respectively

\* No cases from North West territories or Nunavut; < 5 cases from Yukon

**Table 3: Predictors of  $\geq 4$  weeks of antenatal cART uptake, 2011–2016**

| Variable                                | Univariate         |         | Multivariate        |         |
|-----------------------------------------|--------------------|---------|---------------------|---------|
|                                         | OR (95% CI)        | p value | OR (95% CI)         | p value |
| <b>Maternal risk category ‡</b>         |                    |         |                     |         |
| Heterosexual vs. injection drug use     | 2.09 (1.28, 3.42)  | 0.003   | 1.55 (0.77, 3.11)   | 0.22    |
| Perinatal vs. injection drug use        | 1.10 (0.31, 3.86)  | 0.88    | 0.77 (0.21, 2.82)   | 0.69    |
| Other vs. injection drug use ¶          | 4.21 (0.56, 31.93) | 0.16    | 1.61 (0.28, 9.17)   | 0.59    |
| <b>Maternal ethnicity/race</b>          |                    |         |                     |         |
| Black vs. Indigenous                    | 2.16 (1.30, 3.59)  | 0.003   | 2.99 (1.23, 7.26)   | 0.02    |
| White vs. Indigenous                    | 1.19 (0.66, 2.13)  | 0.57    | 1.60 (0.69, 3.70)   | 0.28    |
| Other vs. Indigenous                    | 2.46 (0.85, 7.18)  | 0.10    | 2.12 (0.65, 6.87)   | 0.21    |
| Black vs. White                         | 1.82 (1.04, 3.19)  | 0.04    | 1.87 (0.99, 1.27)   | 0.06    |
| <b>Province/territory †*</b>            |                    |         |                     |         |
| British Columbia/Yukon vs. Alberta      | 2.45 (0.89, 6.74)  | 0.08    | 3.31 (1.06, 10.32)  | 0.04    |
| British Columbia/Yukon vs. Saskatchewan | 2.32 (0.81, 6.68)  | 0.12    | 1.33 (0.42, 4.24)   | 0.62    |
| British Columbia/Yukon vs. Manitoba     | 1.99 (0.61, 6.44)  | 0.25    | 2.14 (0.63, 7.29)   | 0.22    |
| British Columbia/Yukon vs. Ontario      | 1.98 (0.76, 5.16)  | 0.16    | 3.16 (1.08, 9.26)   | 0.04    |
| British Columbia/Yukon vs. Quebec       | 1.88 (0.67, 5.30)  | 0.23    | 3.44 (1.09, 10.84)  | 0.04    |
| British Columbia/Yukon vs. Atlantic     | 5.68 (0.56, 58.08) | 0.14    | 5.48 (0.10, 314.49) | 0.41    |
| <b>Birth year §</b>                     | 1.05 (0.93, 1.19)  | 0.44    | 1.10 (0.96, 1.27)   | 0.16    |
| <b>Gestational age at birth</b>         | 1.07 (0.99, 1.15)  | 0.10    | 1.04 (0.95, 1.14)   | 0.37    |

‡ In a separate analysis, stratified by region (British Columbia/Yukon vs. Alberta/Saskatchewan/Manitoba vs. Ontario/Quebec), the odds ratio for  $\geq 4$  weeks of antenatal cART uptake for heterosexual vs. injection drug use (adjusted for province, birth year, race, gestational age) was 2.75 (95% CI 1.02, 7.39;  $p=0.045$ ) for Ontario/Quebec, 0.73 (95%CI 0.26, 2.05;  $p=0.551$ ) for Alberta/Saskatchewan/Manitoba and 3.70 (95% CI 0.45, 30.68;  $p=0.225$ ) British Columbia/Yukon.

¶ “Other” refers to infection acquired via transfusion or other less common mechanisms

† All other pairwise comparisons between provinces were non-significant

\* No cases from North West territories or Nunavut; < 5 cases from Yukon

§ Odds ratios shown are per year increase

**Table 4: Maternal and infant characteristics for vertically infected infants, 2011–2016 †**

| Case | Maternal HIV diagnosis timing | Antenatal cART duration | Maternal adherence | Maternal VL (copies/mL) | Mode of delivery | GA at birth (weeks) | Birth weight (kg) | Sex | Infants first positive HIV PCR (days) | Infant ART prophylaxis ‡ |
|------|-------------------------------|-------------------------|--------------------|-------------------------|------------------|---------------------|-------------------|-----|---------------------------------------|--------------------------|
| 1    | Preconception                 | ≥4 weeks                | Suboptimal         | ≥1000                   | Elective C/S     | 37                  | 3.28              | F   | 1                                     | ZDV/3TC/NVP              |
| 2    | Preconception                 | <4 weeks                | Suboptimal         | Unknown                 | SVD              | 36                  | 1.64              | M   | 1                                     | ZDV/3TC/NVP              |
| 3    | Preconception                 | <4 weeks                | Suboptimal         | Unknown                 | SVD              | 36                  | 2.27              | F   | 1                                     | ZDV/3TC/NVP              |
| 4    | Preconception                 | <4 weeks                | Suboptimal         | <50                     | SVD              | 38                  | 2.65              | F   | 1309                                  | ZDV/3TC                  |
| 5    | 2 <sup>nd</sup> trimester     | ≥4 weeks                | Suboptimal         | Unknown                 | SVD              | 34                  | 2.11              | F   | 2                                     | ZDV/3 dose NVP           |
| 6    | Intrapartum                   | N/A                     | N/A                | 50-999                  | SVD              | 40                  | 2.97              | M   | 10                                    | ZDV/3TC/3 dose NVP       |
| 7    | Intrapartum                   | N/A                     | N/A                | Unknown                 | SVD              | 39                  | 2.76              | M   | 2                                     | ZDV/3TC/NVP              |
| 8    | Intrapartum                   | N/A                     | N/A                | Unknown                 | SVD              | 33                  | 1.75              | F   | 1                                     | ZDV/1 dose NVP           |
| 9    | Intrapartum                   | N/A                     | N/A                | ≥1000                   | SVD              | 35                  | 1.75              | F   | 1                                     | ZDV/3TC/NVP              |
| 10   | Intrapartum                   | N/A                     | N/A                | ≥1000                   | SVD              | 39                  | 2.76              | M   | 2                                     | ZDV/3TC/ NFV §           |
| 11   | After delivery                | N/A                     | N/A                | Unknown                 | SVD              | 39                  | 3.00              | F   | 129                                   | None                     |
| 12   | After delivery                | N/A                     | N/A                | Unknown                 | Elective C/S     | 41                  | Unknown           | M   | 122                                   | None                     |
| 13   | After delivery                | N/A                     | N/A                | Unknown                 | Elective C/S     | 37                  | 3.40              | M   | 264                                   | None                     |
| 14   | After delivery                | N/A                     | N/A                | Unknown                 | SVD              | 40                  | 2.88              | F   | 484                                   | None                     |

Abbreviations: ART = antiretroviral therapy; cART = combination antiretroviral therapy; C/S = Caesarean section; GA = gestational age; HIV = human immunodeficiency virus; N/A = not applicable; PCR = polymerase chain reaction; SVD = spontaneous vaginal delivery; VL = viral load; ZDV = zidovudine; 3TC = lamivudine; NVP = nevirapine; NFV = nelfinavir

† Maternal risk category: heterosexual (n=9), injection drug use (n=5); Maternal race: black (n=7), indigenous (n=6), white (n=1); Province of birth: Quebec (n=5), Saskatchewan (n=5), Ontario (n=3), Alberta (n=1)

‡ All medications were administered at treatment doses unless specified otherwise.

§ Also received 3 doses of nevirapine during first week of life.

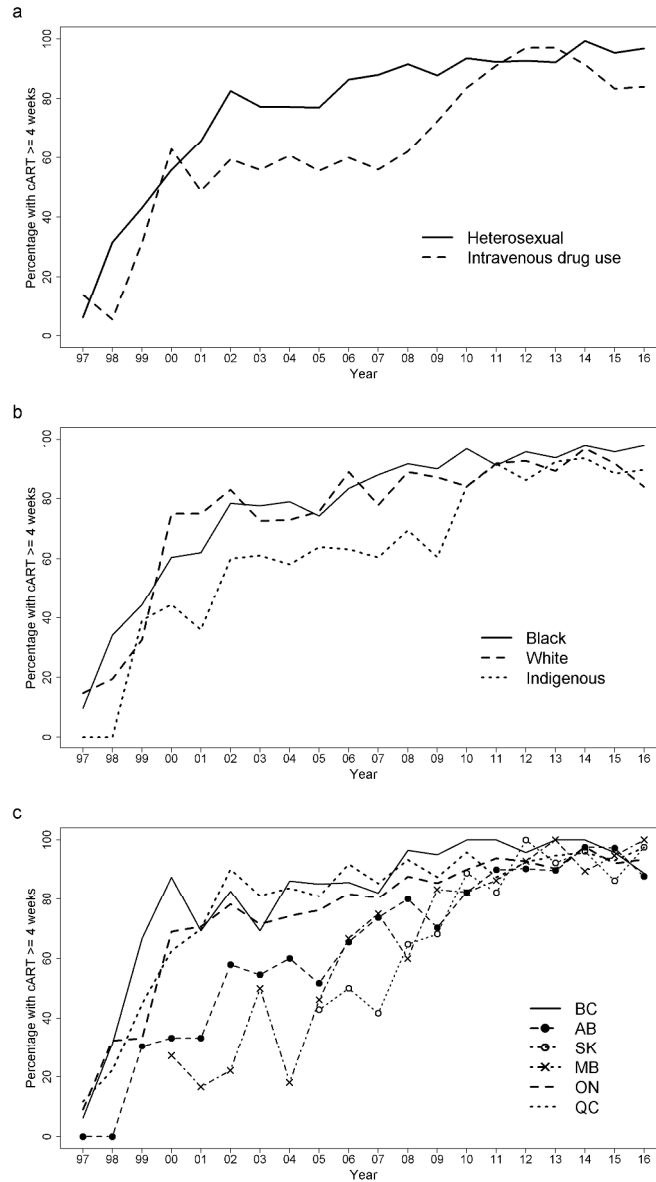

Title: Uptake of antenatal cART ≥ 4 weeks prior to delivery by year.

Legend: Percentage receiving antenatal maternal cART ≥ 4 weeks according to risk category (a), race/ethnicity (b) and geographic region (c). By logistic regression, with year as a continuous variable, there was statistically significant time-trend improvement in antenatal cART uptake ( $p < 0.001$  for all categories in the three plots). For Saskatchewan and Manitoba, data from earlier years were not shown due to small numbers.

286x508mm (192 x 192 DPI)



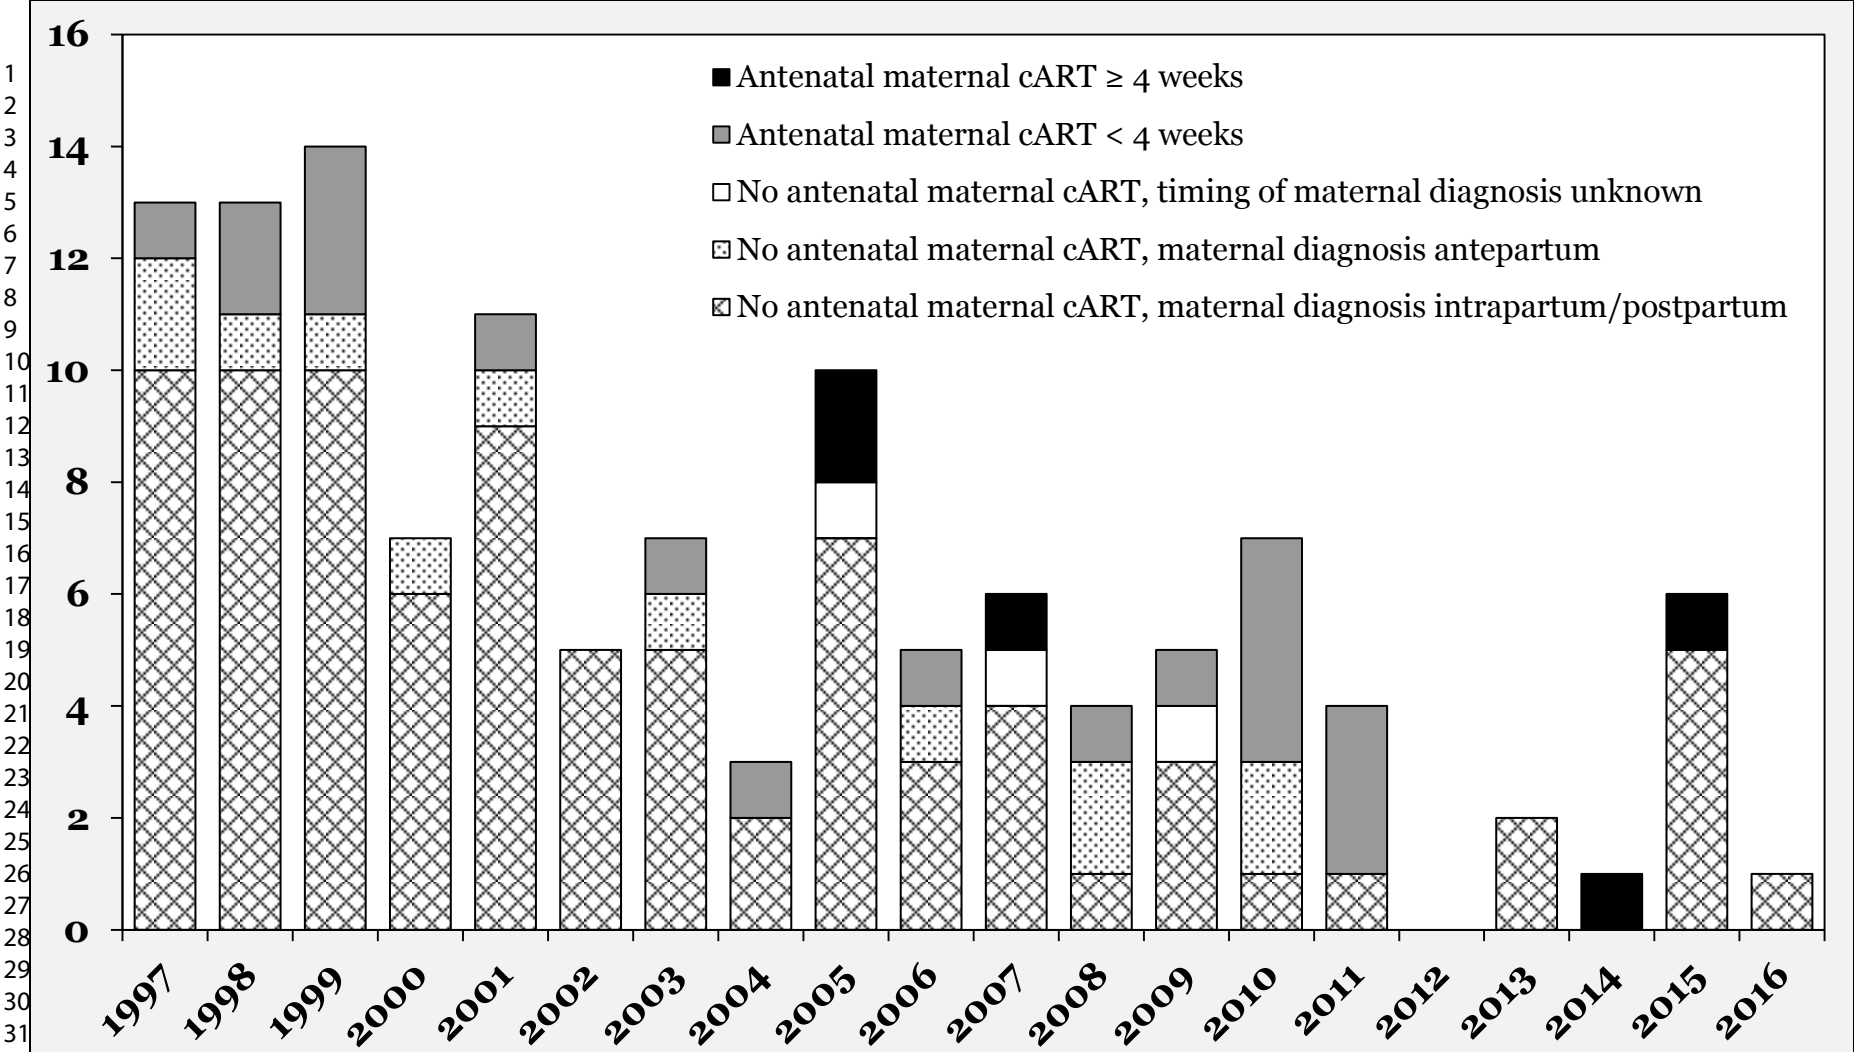

n=124;

One vertical transmission case not shown as maternal cART status was unknown
