# Supplementary material
Source: PubMed Central journal article supplement (PMC7869661)
Supplement: strobe.pdf [file strobe.pdf]

STROBE Statement—checklist of items that should be included in reports of observational studies

|                           | <b>Item No</b> | <b>Recommendation</b>                                                                                                                                                                                                                                                                                                                                                                                                                                                  | <b>Location in study</b>                                                                                                                                                                                                                     |
|---------------------------|----------------|------------------------------------------------------------------------------------------------------------------------------------------------------------------------------------------------------------------------------------------------------------------------------------------------------------------------------------------------------------------------------------------------------------------------------------------------------------------------|----------------------------------------------------------------------------------------------------------------------------------------------------------------------------------------------------------------------------------------------|
| <b>Title and abstract</b> | 1              | (a) Indicate the study’s design with a commonly used term in the title or the abstract                                                                                                                                                                                                                                                                                                                                                                                 | Page 3, lines 56 – 57                                                                                                                                                                                                                        |
|                           |                | (b) Provide in the abstract an informative and balanced summary of what was done and what was found                                                                                                                                                                                                                                                                                                                                                                    | Page 3                                                                                                                                                                                                                                       |
| <b>Introduction</b>       |                |                                                                                                                                                                                                                                                                                                                                                                                                                                                                        |                                                                                                                                                                                                                                              |
| Background/rationale      | 2              | Explain the scientific background and rationale for the investigation being reported                                                                                                                                                                                                                                                                                                                                                                                   | Page 5, lines 80 – 94                                                                                                                                                                                                                        |
| Objectives                | 3              | State specific objectives, including any prespecified hypotheses                                                                                                                                                                                                                                                                                                                                                                                                       | Page 5, lines 95 – 99                                                                                                                                                                                                                        |
| <b>Methods</b>            |                |                                                                                                                                                                                                                                                                                                                                                                                                                                                                        |                                                                                                                                                                                                                                              |
| Study design              | 4              | Present key elements of study design early in the paper                                                                                                                                                                                                                                                                                                                                                                                                                | Pages 6– 7, lines 102 – 134                                                                                                                                                                                                                  |
| Setting                   | 5              | Describe the setting, locations, and relevant dates, including periods of recruitment, exposure, follow-up, and data collection                                                                                                                                                                                                                                                                                                                                        | Setting/location: page 6, lines 102 – 106;<br>Relevant dates: page 7, lines 125 – 126;<br>Follow-up: previously describe in reference 4 (mentioned on page 6, line 112) and lines 112 – 114;<br>Data collection: page 6 – 7, lines 112 – 124 |
| Participants              | 6              | (a) <i>Cohort study</i> —Give the eligibility criteria, and the sources and methods of selection of participants. Describe methods of follow-up<br><i>Case-control study</i> —Give the eligibility criteria, and the sources and methods of case ascertainment and control selection. Give the rationale for the choice of cases and controls<br><i>Cross-sectional study</i> —Give the eligibility criteria, and the sources and methods of selection of participants | Eligibility: page 7, lines 125 – 126;<br>Sources/methods: page 6, lines 102 – 106                                                                                                                                                            |
|                           |                | (b) <i>Cohort study</i> —For matched studies, give matching criteria and number of exposed and unexposed<br><i>Case-control study</i> —For matched studies, give matching criteria and the number of controls per case                                                                                                                                                                                                                                                 | Not applicable                                                                                                                                                                                                                               |
| Variables                 | 7              | Clearly define all outcomes, exposures, predictors, potential confounders, and effect modifiers. Give diagnostic criteria, if applicable                                                                                                                                                                                                                                                                                                                               | HIV diagnosis criteria: page 6– 7, lines 119 – 124;<br>Adequacy of antiretroviral therapy outcomes: page 7, lines 126 – 129;                                                                                                                 |

Specific outcomes: page 7, lines 129 – 136;  
 Potential predictors: variables collected listed page 6, lines 114 – 119, their possible role in regression analysis on page 7, lines 140 – 143

|                              |    |                                                                                                                                                                                      |                                                                                                                                 |
|------------------------------|----|--------------------------------------------------------------------------------------------------------------------------------------------------------------------------------------|---------------------------------------------------------------------------------------------------------------------------------|
| Data sources/<br>measurement | 8* | For each variable of interest, give sources of data and details of methods of assessment (measurement). Describe comparability of assessment methods if there is more than one group | Page 6, lines 102 – 106 and 114 - 119                                                                                           |
| Bias                         | 9  | Describe any efforts to address potential sources of bias                                                                                                                            | Page 7, lines 140 – 143                                                                                                         |
| Study size                   | 10 | Explain how the study size was arrived at                                                                                                                                            | All mother-infants pairs detected during the study period were included (surveillance data)                                     |
| Quantitative variables       | 11 | Explain how quantitative variables were handled in the analyses. If applicable, describe which groupings were chosen and why                                                         | Page 7, lines 135 – 144                                                                                                         |
| Statistical methods          | 12 | (a) Describe all statistical methods, including those used to control for confounding                                                                                                | Page 7, lines 135 – 144                                                                                                         |
|                              |    | (b) Describe any methods used to examine subgroups and interactions                                                                                                                  | Page 7, lines 138 – 143                                                                                                         |
|                              |    | (c) Explain how missing data were addressed                                                                                                                                          | In Methods section: page 7, lines 142 – 144; Missing data (proportions etc.) describes throughout results section and in tables |
|                              |    | (d) <i>Cohort study</i> —If applicable, explain how loss to follow-up was addressed                                                                                                  | Methods: page 7, lines 142 – 144;                                                                                               |
|                              |    | <i>Case-control study</i> —If applicable, explain how matching of cases and controls was addressed                                                                                   | Results: children with indeterminate HIV status described on page 8, lines 149 – 151;                                           |
|                              |    | <i>Cross-sectional study</i> —If applicable, describe analytical methods taking account of sampling strategy                                                                         | Results: cases with missing cART information described on page 8, lines 156 – 161                                               |
|                              |    | (e) Describe any sensitivity analyses                                                                                                                                                | N/A                                                                                                                             |

## Results

|              |     |                                                             |                          |
|--------------|-----|-------------------------------------------------------------|--------------------------|
| Participants | 13* | (a) Report numbers of individuals at each stage of study—eg | Page 8, lines 147 – 155, |
|--------------|-----|-------------------------------------------------------------|--------------------------|

|                   |     |                                                                                                                                                                                                              |                                                                                                                                                                            |
|-------------------|-----|--------------------------------------------------------------------------------------------------------------------------------------------------------------------------------------------------------------|----------------------------------------------------------------------------------------------------------------------------------------------------------------------------|
|                   |     | numbers potentially eligible, examined for eligibility, confirmed eligible, included in the study, completing follow-up, and analysed                                                                        | 156 – 161                                                                                                                                                                  |
|                   |     | (b) Give reasons for non-participation at each stage                                                                                                                                                         | N/A                                                                                                                                                                        |
|                   |     | (c) Consider use of a flow diagram                                                                                                                                                                           | N/A                                                                                                                                                                        |
| Descriptive data  | 14* | (a) Give characteristics of study participants (eg demographic, clinical, social) and information on exposures and potential confounders                                                                     | Table 1                                                                                                                                                                    |
|                   |     | (b) Indicate number of participants with missing data for each variable of interest                                                                                                                          | Results: children with indeterminate HIV status described on page 8, lines 149 – 151;<br>Results: cases with missing cART information described on page 8, lines 156 – 161 |
|                   |     | (c) <i>Cohort study</i> —Summarise follow-up time (eg, average and total amount)                                                                                                                             | N/A                                                                                                                                                                        |
| Outcome data      | 15* | <i>Cohort study</i> —Report numbers of outcome events or summary measures over time                                                                                                                          | Throughout results sections, tables and figures                                                                                                                            |
|                   |     | <i>Case-control study</i> —Report numbers in each exposure category, or summary measures of exposure                                                                                                         | N/A                                                                                                                                                                        |
|                   |     | <i>Cross-sectional study</i> —Report numbers of outcome events or summary measures                                                                                                                           | N/A                                                                                                                                                                        |
| Main results      | 16  | (a) Give unadjusted estimates and, if applicable, confounder-adjusted estimates and their precision (eg, 95% confidence interval). Make clear which confounders were adjusted for and why they were included | Throughout results section, Table 3                                                                                                                                        |
|                   |     | (b) Report category boundaries when continuous variables were categorized                                                                                                                                    | N/A                                                                                                                                                                        |
|                   |     | © If relevant, consider translating estimates of relative risk into absolute risk for a meaningful time period                                                                                               | N/A                                                                                                                                                                        |
| Other analyses    | 17  | Report other analyses done—eg analyses of subgroups and interactions, and sensitivity analyses                                                                                                               | Throughout results section                                                                                                                                                 |
| <b>Discussion</b> |     |                                                                                                                                                                                                              |                                                                                                                                                                            |
| Key results       | 18  | Summarise key results with reference to study objectives                                                                                                                                                     | Page 11 – 12, lines 219 – 238                                                                                                                                              |
| Limitations       | 19  | Discuss limitations of the study, taking into account sources of potential bias or imprecision. Discuss both direction and magnitude of any potential bias                                                   | Page 12 – 13, lines 253 – 263                                                                                                                                              |
| Interpretation    | 20  | Give a cautious overall interpretation of results considering objectives, limitations, multiplicity of analyses, results from similar studies, and other relevant evidence                                   | Page 13, lines 264 – 270                                                                                                                                                   |
| Generalisability  | 21  | Discuss the generalisability (external validity) of the study results                                                                                                                                        | Page 12, lines 239 – 252                                                                                                                                                   |

## Other information

---

|         |    |                                                                                                                                                               |                              |
|---------|----|---------------------------------------------------------------------------------------------------------------------------------------------------------------|------------------------------|
| Funding | 22 | Give the source of funding and the role of the funders for the present study and, if applicable, for the original study on which the present article is based | PHAC, acknowledgment section |
|---------|----|---------------------------------------------------------------------------------------------------------------------------------------------------------------|------------------------------|

\*Give information separately for cases and controls in case-control studies and, if applicable, for exposed and unexposed groups in cohort and cross-sectional studies.

**Note:** An Explanation and Elaboration article discusses each checklist item and gives methodological background and published examples of transparent reporting. The STROBE checklist is best used in conjunction with this article (freely available on the Web sites of PLoS Medicine at <http://www.plosmedicine.org/>, Annals of Internal Medicine at <http://www.annals.org/>, and Epidemiology at <http://www.epidem.com/>). Information on the STROBE Initiative is available at [www.strobe-statement.org](http://www.strobe-statement.org).
